# Supplementary material for: Impact of a mobile health application on adherence to antibiotic guidelines in a Vietnamese hospital
Source: Research Square preprint supplement (doi:10.21203/rs.3.rs-8428904/v1), 2025-12-30
Supplement: Supplementary file 1 [file 006d6447eb00d578517a6a4e.docx]

Table 4. Guidelines adherence rates in the two study periods

| **Adherence categories** | **Pre-intervention**  **(n1 = 260)** | **Intervention**  **(n2 = 261)** | ***p* Value** |
| --- | --- | --- | --- |
| Antibiotic selection, *n (%)* | 224 (86.2) | 240 (92.0) | 0.036 |
| Dosage, *n (%)* | 238 (91.5) | 245 (93.9) | 0.318 |
| Overall adherence, *n (%)* | 205 (78.8) | 225 (86.2) | 0.029 |
