# Supplementary material for: Impact of a mobile health application on adherence to antibiotic guidelines in a Vietnamese hospital
Source: Research Square preprint supplement (doi:10.21203/rs.3.rs-8428904/v1), 2025-12-30
Supplement: Supplementary file 2 [file 1f8c41f870cd7fae4afe068e.docx]

Table 3. Prescribers’ characteristics

| **Characteristics** | **Pre-intervention**  **(n1 = 92)** | **Intervention**  **(n2 = 81)** |
| --- | --- | --- |
| Gender, *n (%)* |  |  |
| Male | 51 (55.4) | 45 (55.6) |
| Female | 41 (44.6) | 36 (44.4) |
| Education level, *n (%)* |  |  |
| MD | 45 (48.9) | 37 (45.7) |
| Specialist Level 1 - MSc | 35 (38.0) | 36 (44.4) |
| Specialist Level 2 - PhD | 12 (13.1) | 8 (9.9) |
| Years of experience, *median (IQR)* | 9 (4-18) | 10 (6-18) |
| Abbreviations: IQR, interquartile range; MD, Doctor of Medicine; MSc, Master of Science; PhD, Doctor of Philosophy | | |
