# Supplementary material for: Impact of a mobile health application on adherence to antibiotic guidelines in a Vietnamese hospital
Source: Research Square preprint supplement (doi:10.21203/rs.3.rs-8428904/v1), 2025-12-30
Supplement: Supplementary file 3 [file c9a6cf2523d2f2291f3ba867.docx]

Table 7. Factors related to treatment failure

| **Factors** | ***p* Value** | **OR** | **95% CI** |
| --- | --- | --- | --- |
| Age | 0.092 | 1.024 | 0.996-1.054 |
| CCI score | **< 0.001** | 1.426 | 1.171-1.737 |
| Respiratory infection | **0.027** | 2.786 | 1.122-6.916 |
| Bloodstream infection | **0.007** | 3.408 | 1.389-8.360 |
| Central nervous infection | **0.039** | 8.639 | 1.113-67.087 |
| Abbreviations: CI, confidence interval; OR, odds ratio; CCI, Charlson comorbidity index | | | |
