# Supplementary material for: Impact of a mobile health application on adherence to antibiotic guidelines in a Vietnamese hospital
Source: Research Square preprint supplement (doi:10.21203/rs.3.rs-8428904/v1), 2025-12-30
Supplement: Supplementary file 4 [file d15dbb17ed0f3345a82f87e1.docx]

Table 1. TNGUIDE process indicator during the study period

| **Indicator** | **After 1 month** | **After 5 months** |
| --- | --- | --- |
| Registers, *n (%)* | 140 (43.9) | 216 (67.7) |
| Log in, *n (%)* | 77 (24.1) | 117 (36.7) |
| Average sessions per user, *n* | 6 | 13 |
| Time used per session (min) | 2.5 | 1.6 |
| Infection site guidelines views, *n* |  |  |
| Respiratory | 369 | 1.094 |
| Skin and soft tissue | 226 | 501 |
| Intra-abdominal | 193 | 544 |
| Urinary tract | 127 | 436 |
| Bloodstream | 84 | 282 |
| Bone and joint | 28 | 96 |
| Cardiovascular | 37 | 62 |
| Central nervous system | 21 | 34 |
