# Supplementary material for: Impact of a mobile health application on adherence to antibiotic guidelines in a Vietnamese hospital
Source: Research Square preprint supplement (doi:10.21203/rs.3.rs-8428904/v1), 2025-12-30
Supplement: Supplementary file 5 [file fc8ebb3d43470dcf7d0a4fb1.docx]

Table 2. Patients’ demographics and clinical characteristics

| **Characteristics** | **Pre-intervention**  **(n1 = 260)** | **Intervention**  **(n2 = 261)** | ***p* Value** |
| --- | --- | --- | --- |
| Age (years), *median (IQR)* | 71 (58-72) | 74 (57-85) | 0.180 |
| < 65 | 93 (35.8) | 87 (33.3) | 0.581 |
| ≥ 65 | 167 (64.2) | 174 (66.7) |  |
| Gender, *n (%)* |  |  |  |
| Male | 137 (52.7) | 132 (50.6) | 0.661 |
| Female | 123 (47.3) | 129 (49.4) |  |
| eGFR (mL/min/1.73 m2), *mean ± SD* | 70.5 ± 30.8 | 71.8 ± 26.1 | 0.616 |
| Number of comorbidities, *median (IQR)* | 3 (2-5) | 3 (1-4) | 0.058 |
| CCI score, *median (IQR)* | 1 (0-2) | 0 (0-1) | 0.087 |
| Site of infection, *n (%)*¶ |  |  |  |
| Respiratory | 119 (45.8) | 133 (51.0) | 0.255 |
| Skin and soft tissue | 29 (11.2) | 24 (9.2) | 0.473 |
| Intra-abdominal | 71 (27.3) | 57 (21.8) | 0.155 |
| Urinary tract | 45 (17.3) | 48 (18.4) | 0.819 |
| Bloodstream | 35 (13.5) | 53 (20.3) | **0.037** |
| Bone and joint | - | 1 (0.4) | 1.000 |
| Cardiovascular | 3 (1.2) | - | 0.124 |
| Central nervous system | 3 (1.2) | 3 (1.1) | 1.000 |
| Source of infection, *n (%)* |  |  |  |
| Hospital-acquired | 17 (6.5) | 15 (5.7) | 0.707 |
| Community-acquired | 243 (93.5) | 246 (94.3) |  |
| Antibiotic therapy, *n (%)* |  |  |  |
| Monotherapy | 144 (55.4) | 127 (48.7) | 0.056 |
| Dual therapy | 105 (40.4) | 129 (49.4) |  |
| Triple therapy | 11 (4.2) | 5 (1.9) |  |
| ¶*Note*: Each patient may have more than one infection concurrently, therefore, the total rate of infections in each period may exceed 100%  Abbreviations: IQR, interquartile range; SD, standard deviation; eGFR, estimated glomerular filtration rate; CCI, Charlson comorbidity index | | | |
