# Supplementary material for: Impact of a mobile health application on adherence to antibiotic guidelines in a Vietnamese hospital
Source: Research Square preprint supplement (doi:10.21203/rs.3.rs-8428904/v1), 2025-12-30
Supplement: Supplementary file 6 [file fcb418cb5bc7447aac29a3f3.docx]

Table 6. Therapy duration, length of hospital stays and treatment outcomes

| **Parameters** | **Pre-intervention**  **(n1 = 260)** | **Intervention**  **(n2 = 261)** | ***p* Value** |
| --- | --- | --- | --- |
| Therapy duration (days), *median (IQR)* | 12.0 (9.0-15.0) | 10.0 (7.0-13.0) | **< 0.001** |
| Length of hospital stay (days), *median (IQR)* | 10.0 (7.3-15.0) | 9.0 (7.0-13.0) | **0.003** |
| Treatment success, *n (%)* | 245 (94.2) | 245 (93.9) | 0.862 |
| Abbreviations: IQR, interquartile range | | | |
