# Supplementary material for: Impact of a mobile health application on adherence to antibiotic guidelines in a Vietnamese hospital
Source: Research Square preprint supplement (doi:10.21203/rs.3.rs-8428904/v1), 2025-12-30
Supplement: Supplementary file 7 [file ff274062f212d944b29c37eb.docx]

Table 5. Factors related to guidelines’ adherence

| **Factors** | ***p* Value** | **OR** | **95% CI** |
| --- | --- | --- | --- |
| Post-intervention period | **0.017** | 1.780 | 1.111-2.854 |
| eGFR | 0.063 | 1.008 | 1.000-1.016 |
| Respiratory infection | **< 0.001** | 0.383 | 0.236-0.620 |
| Abbreviations: CI, confidence interval; OR, odds ratio; eGFR, estimated glomerular filtration rate | | | |
